# Supplementary material
Source: PubMed Central journal article supplement (PMC5921937)
Supplement: NIHMS957432-supplement-supplement_1.pdf [file NIHMS957432-supplement-supplement_1.pdf]

**Supplemental Table 1.** Metabolic disruptors and type 2 diabetes

| <b>Chemical / Chemical Group</b> | <b>In vitro: cell or organ culture</b> | <b>Laboratory animals</b>                                                        |
|----------------------------------|----------------------------------------|----------------------------------------------------------------------------------|
| TCDD/Dioxins                     | [71-73]                                | Adult Exposure [74]                                                              |
| TCDD/Dioxins                     | [57, 132]                              | Adult Exposure [55,133,134]                                                      |
| TCDD/Dioxins                     |                                        | Adult Exposure [133]                                                             |
| Triphenyltin                     | [11-13]                                | Adult Exposure [135]                                                             |
| TBT                              |                                        | Adult Exposure [75]                                                              |
| TBT                              |                                        | Adult Exposure [76]                                                              |
| Arsenic                          | [14-17]                                | Adult Exposure [68,136]<br>Developmental Exposure [126]                          |
| Arsenic                          | [50,53]                                | Adult Exposure [68,114,124]                                                      |
| Arsenic                          |                                        | Adult Exposure [114,137]<br>Developmental Exposure [104]                         |
| Cadmium                          | [33,34]                                |                                                                                  |
| Cadmium                          |                                        | Adult Exposure [59]                                                              |
| Mercury                          | [35,36]                                | Adult Exposure [36]                                                              |
| PCBs                             | [20]                                   | Adult Exposure [138]                                                             |
| PCBs                             | [139]                                  | Adult Exposure [129,130]                                                         |
| BPA                              | [140-142]                              | Adult Exposure [39,108,143,144]<br>Developmental Exposure [40,63,101]            |
| BPA                              | [51,78]                                | Adult Exposure [48,52,64,77,143,145]<br>Developmental Exposure [101,110,146-148] |
| BPA                              |                                        | Developmental Exposure [113,149]                                                 |
| Nonylphenol                      |                                        | Developmental Exposure [150]                                                     |
| Octylphenol                      |                                        | Adult Exposure [151]                                                             |
| Phenolic Compounds               | [19]                                   |                                                                                  |
| PFOA/PFOS                        |                                        | Developmental Exposure [106,107,152]                                             |
| POPs                             | [62]                                   | Adult Exposure [62,153]                                                          |

|                      |          |                                                          |
|----------------------|----------|----------------------------------------------------------|
| DEHP                 |          | Adult Exposure [154]<br>Developmental Exposure [155,156] |
| DEHP                 | [56,157] | Adult Exposure [57]<br>Developmental Exposure [58,155]   |
| DEHP                 |          | Adult Exposure [69]                                      |
| MEHP                 |          | Developmental Exposure [158]                             |
| Diisobutyl Phthalate |          | Developmental Exposure [159]                             |
| Amitraz              |          | Adult Exposure [160]                                     |
| Nicotine             |          | Developmental Exposure [161]                             |
| Alloxan              |          | Adult Exposure [162]                                     |
| DDT                  |          | Adult Exposure [163]                                     |
| Tolylfluamid         | [49]     | Adult Exposure [90]                                      |
| Atrazine             |          | Adult Exposure [112]                                     |
| Malathion            |          | Adult Exposure [164]                                     |
| Malathion            |          | Adult Exposure [165]                                     |
| Diazinon             |          | Adult Exposure [166]                                     |
| Dimethoate           |          | Adult Exposure [167]                                     |
| Penta-BDE            |          | Adult Exposure [168]                                     |
| DES                  |          | Developmental Exposure [150]                             |
| Particulate Matter   |          | Adult Exposure [97,98,111]                               |
| Mixtures             |          | Developmental Exposure [169,170]                         |

**Blue: Pancreatic Function,  $\beta$ -cell Function, Islet Function, and Insulin Secretion**  
**Orange: Insulin Action, Insulin Signaling, and Glucose Uptake**  
**Green: Glucose Homeostasis Not Otherwise Specified and Diabetes Diagnoses**
